# Supplementary material
Source: PubMed Central journal article supplement (PMC1544250)

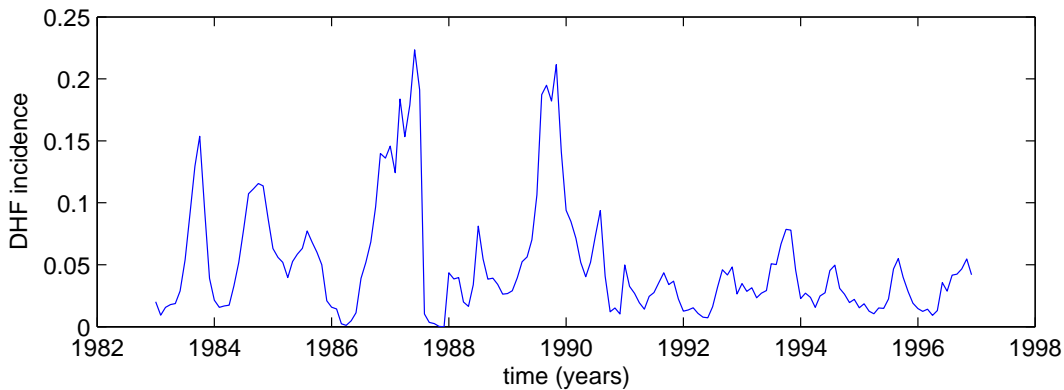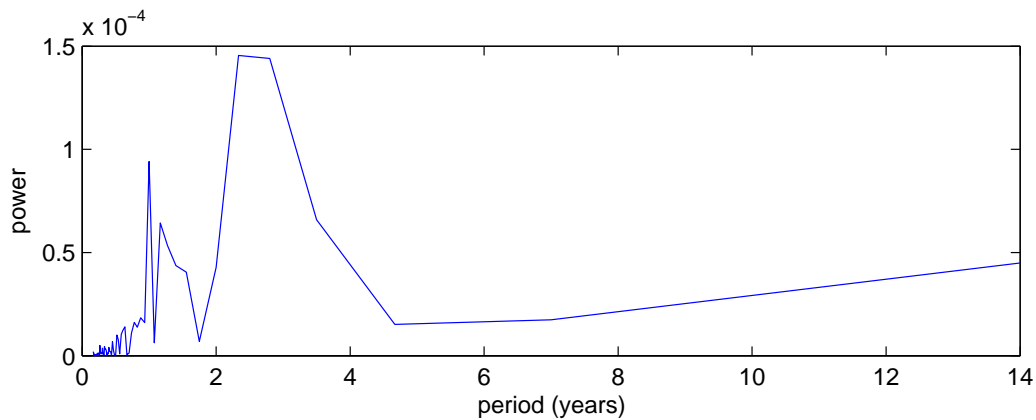

Supplement: pnas_0602960103_1.pdf [file pnas_0602960103_1.pdf]

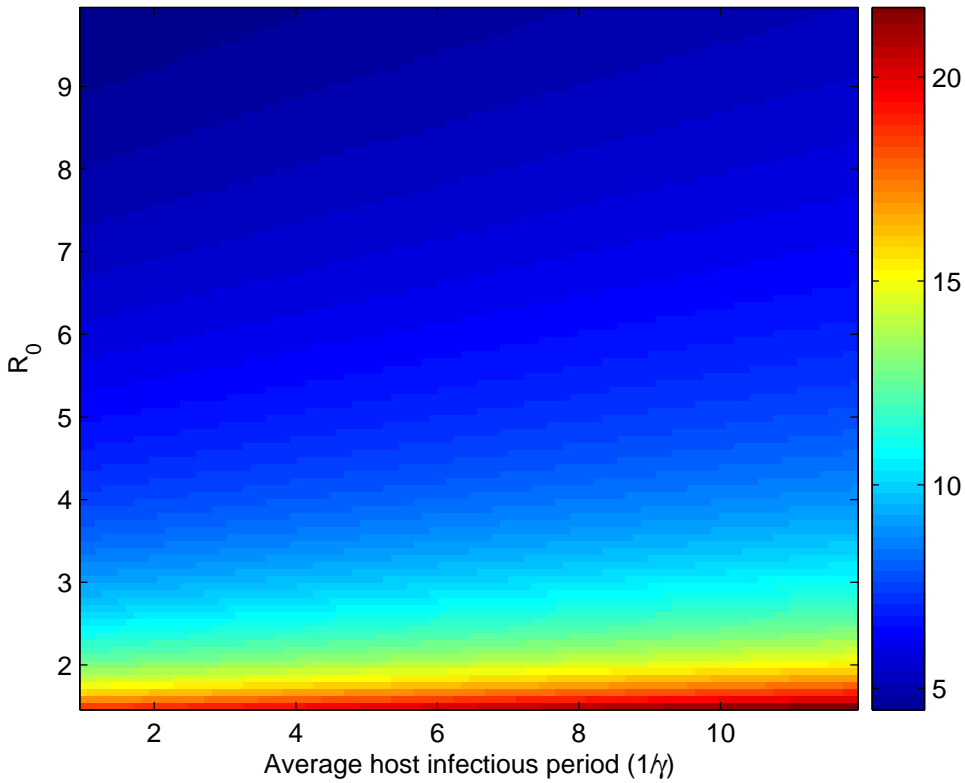

Supplement: pnas_0602960103_10.pdf [file pnas_0602960103_10.pdf]

$\chi=1$ 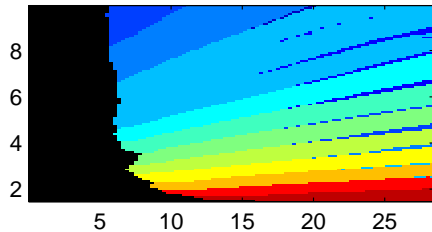 $\chi=2$ 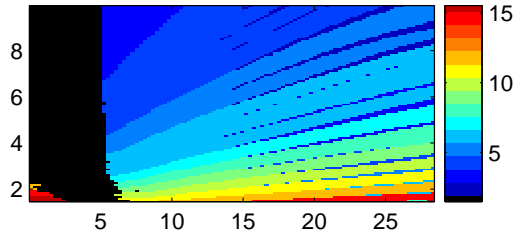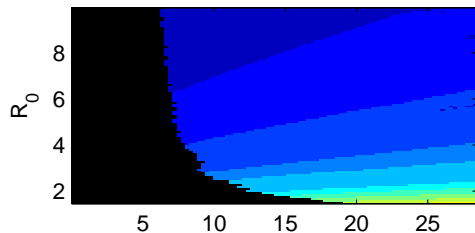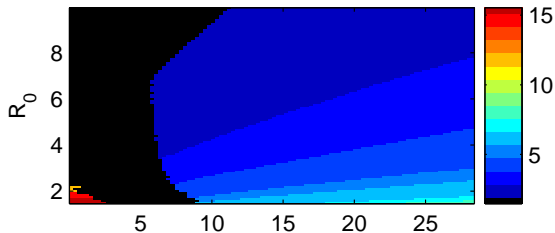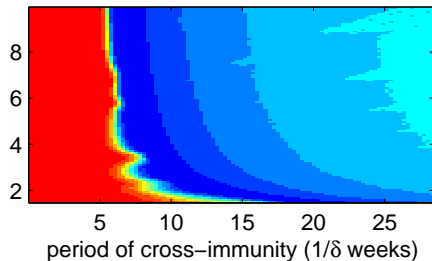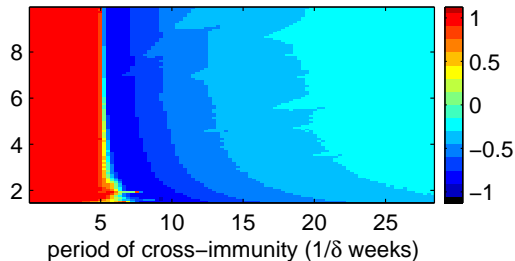

Supplement: pnas_0602960103_11.pdf [file pnas_0602960103_11.pdf]

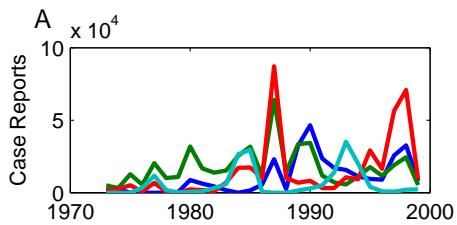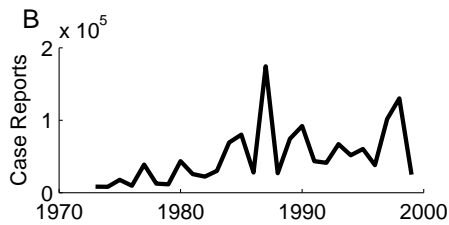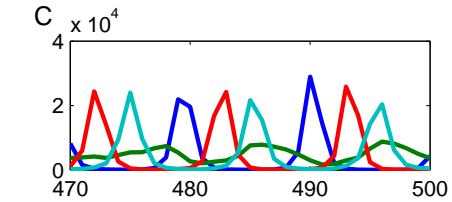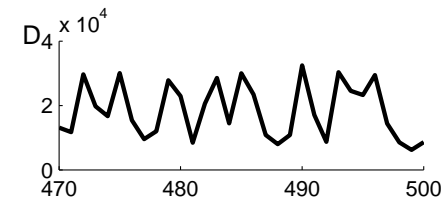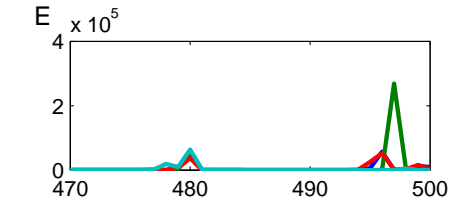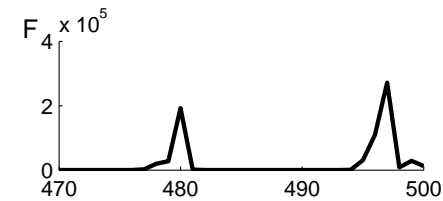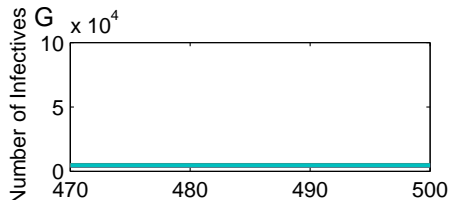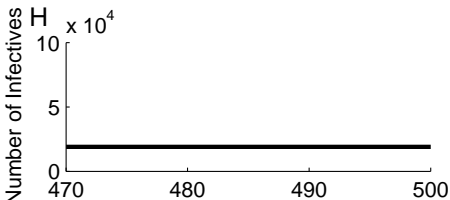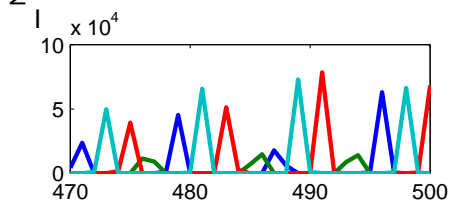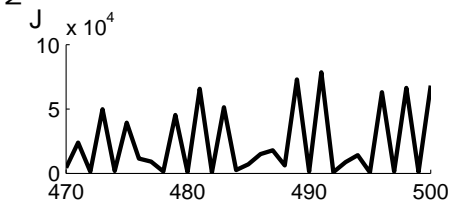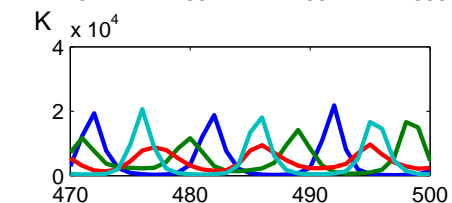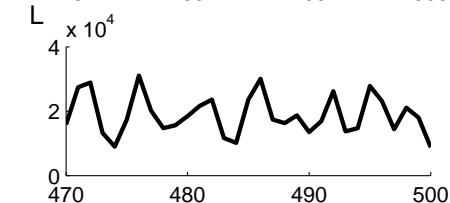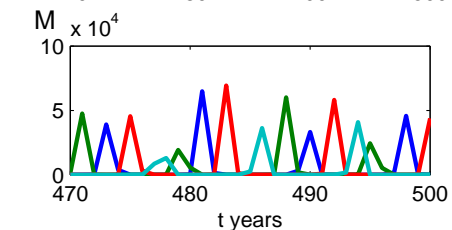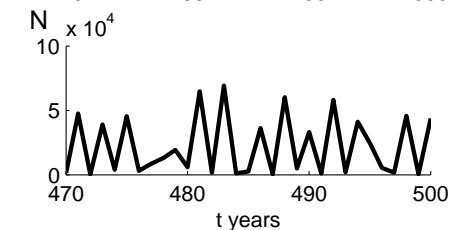

Supplement: pnas_0602960103_2.pdf [file pnas_0602960103_2.pdf]

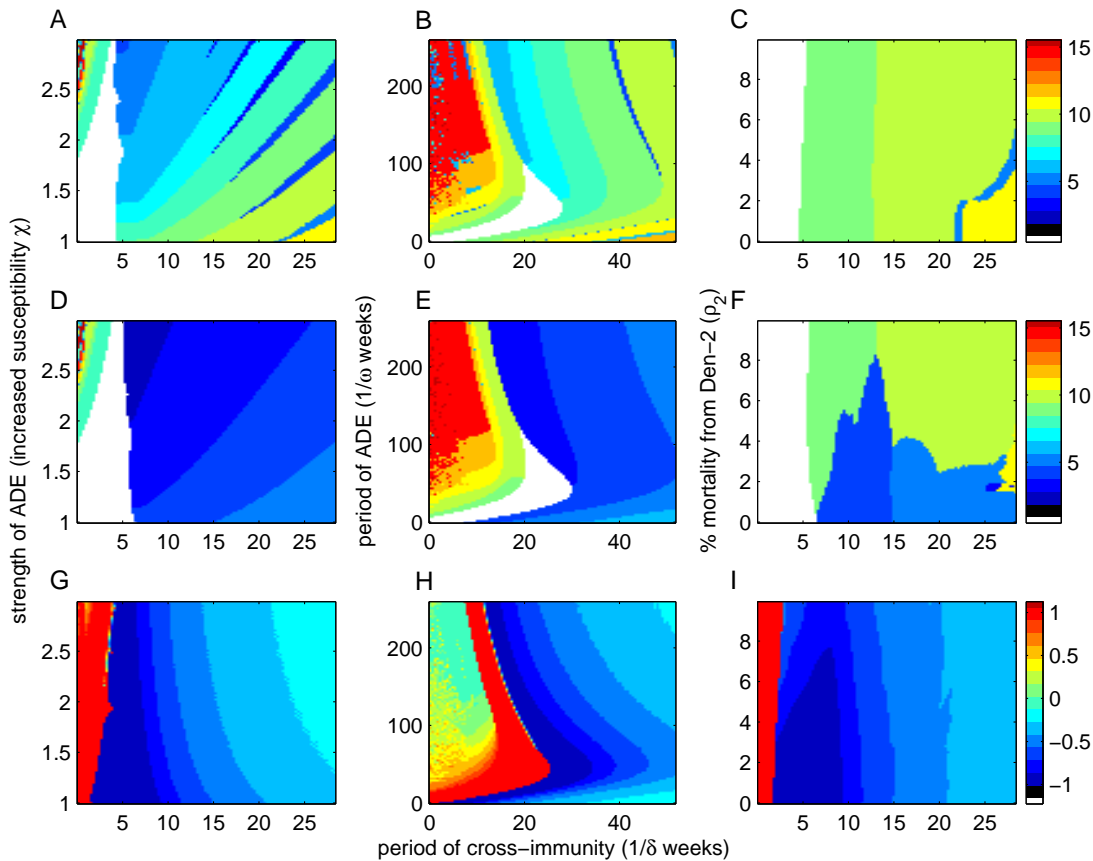

Supplement: pnas_0602960103_3.pdf [file pnas_0602960103_3.pdf]

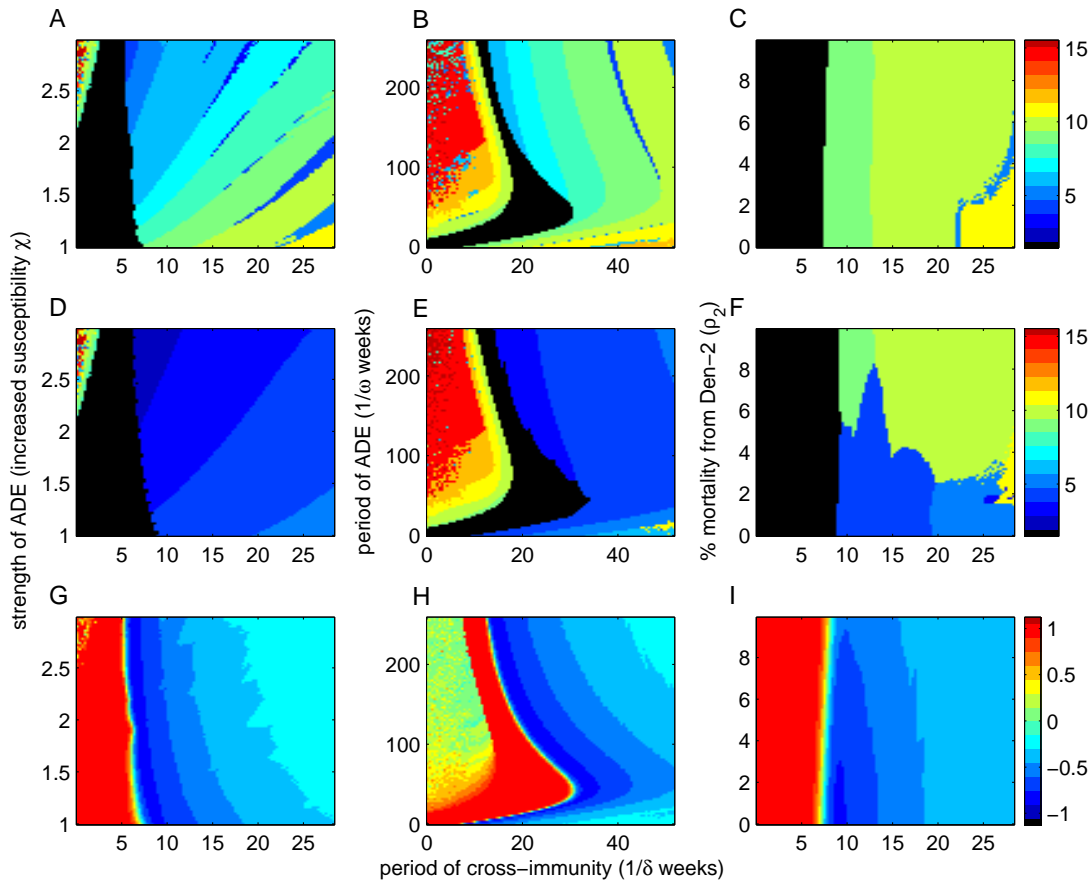

Supplement: pnas_0602960103_4.pdf [file pnas_0602960103_4.pdf]

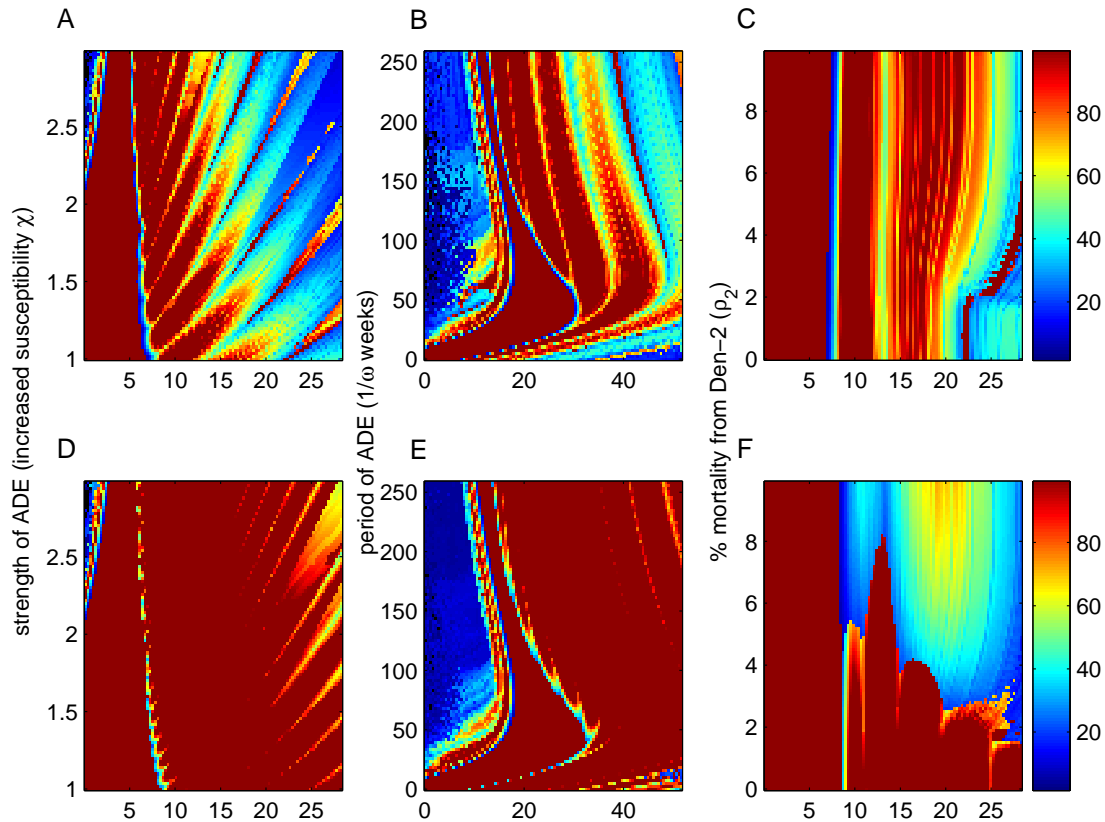

Supplement: pnas_0602960103_5.pdf [file pnas_0602960103_5.pdf]

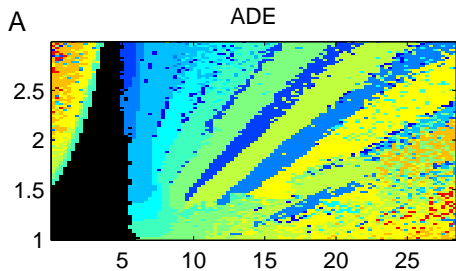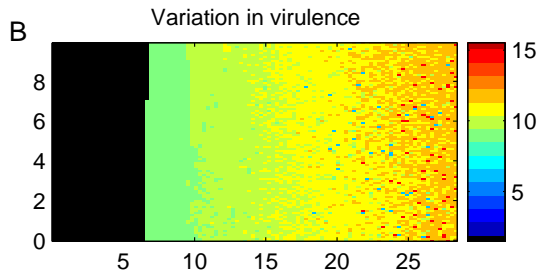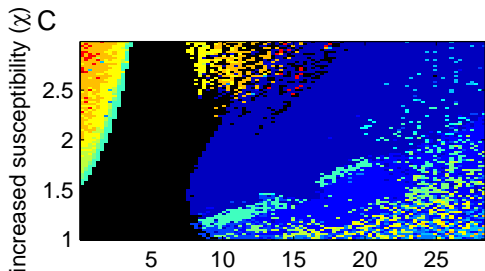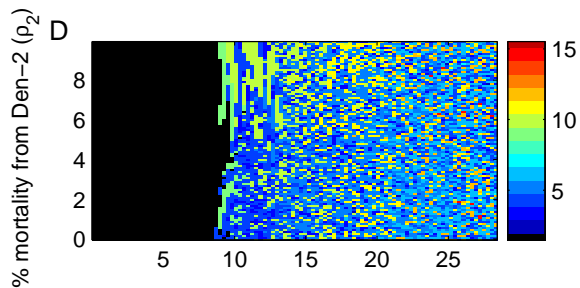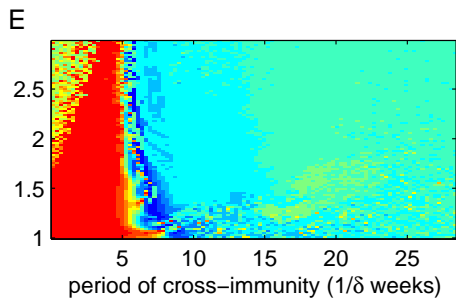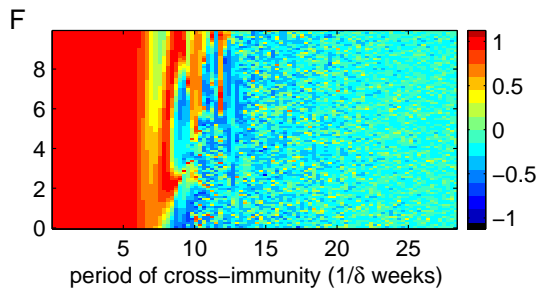

Supplement: pnas_0602960103_6.pdf [file pnas_0602960103_6.pdf]

## ADE

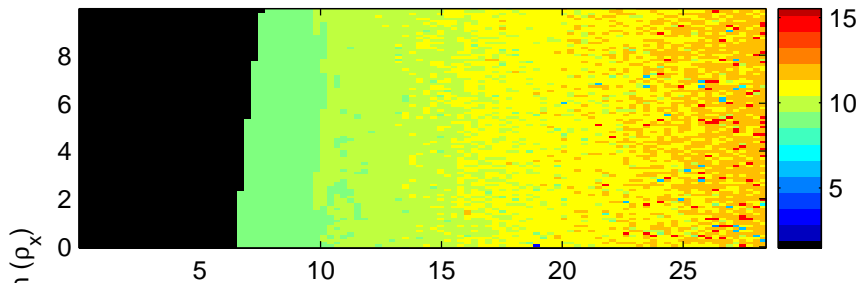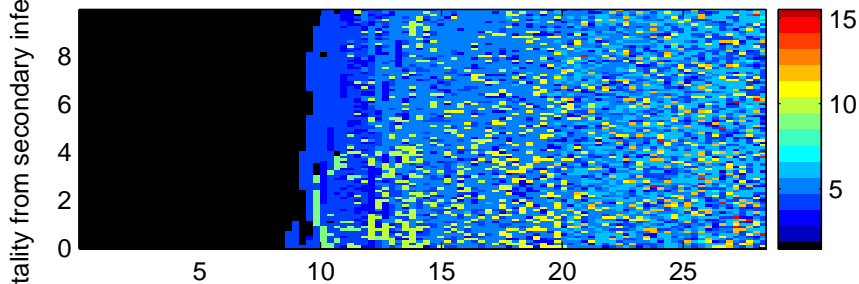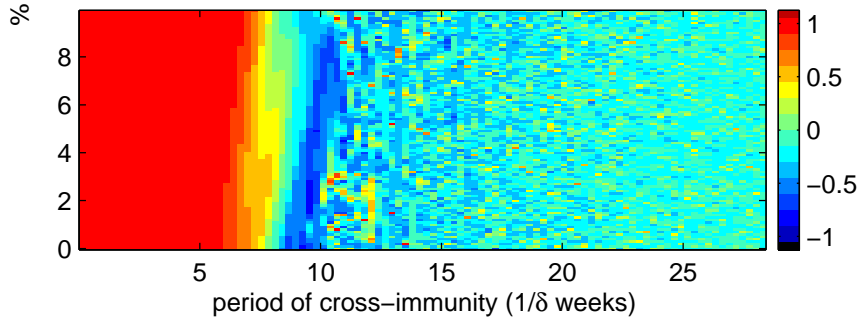

Supplement: pnas_0602960103_7.pdf [file pnas_0602960103_7.pdf]

Variation in virulence

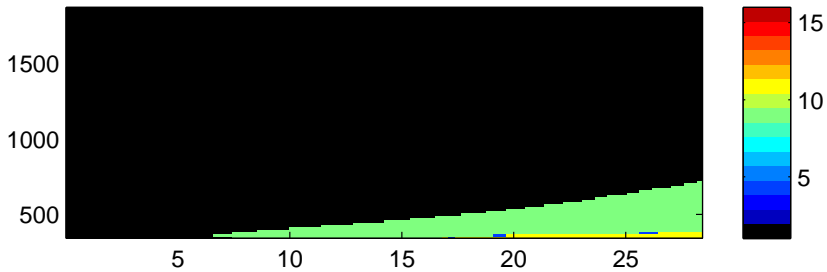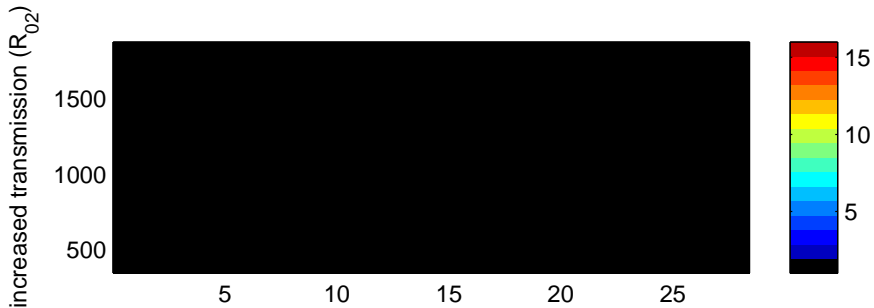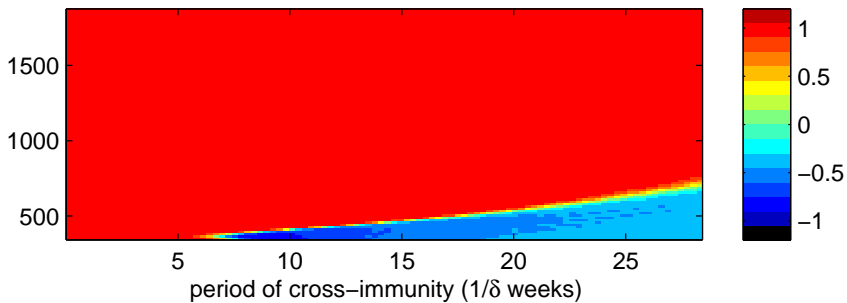

Supplement: pnas_0602960103_8.pdf [file pnas_0602960103_8.pdf]

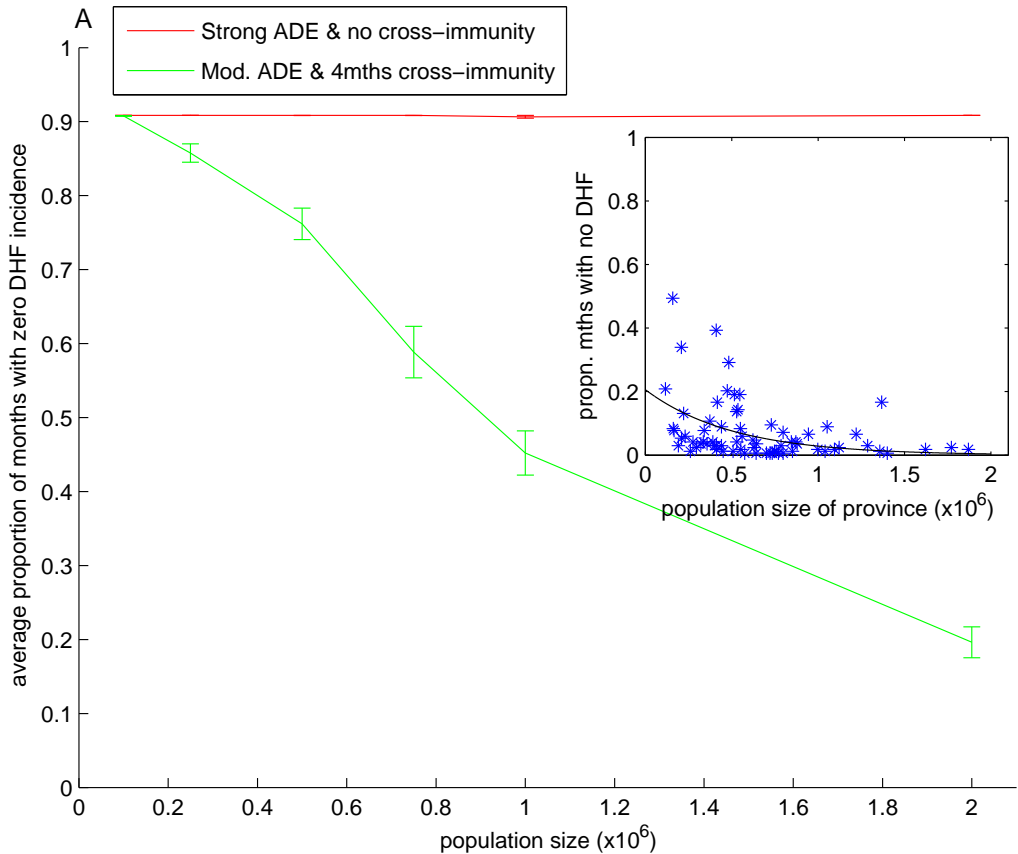

Supplement: pnas_0602960103_9.pdf [file pnas_0602960103_9.pdf]
